# Supplementary material
Source: publisher figshare collection journal article supplement (https://rs.figshare.com/ndownloader/files/17920406)
Supplement: Supplementary file 1 [file 17920406]

***Rostro-García et al*. An adaptable but threatened big cat: density, diet, and prey selection**

**of the Indochinese leopard (*Panthera pardus delacouri*) in eastern Cambodia**

**Supplementary Tables**

**Table S1.** Summaries from Maximum-likelihood spatially explicit capture-recapture models using different buffer width to estimate leopard density during 2014 in Srepok Wildlife Sanctuary, Cambodia.

| **Buffer width** | **Parameters** | **Value** | **SE** | **LC** | **UC** |
| --- | --- | --- | --- | --- | --- |
| *10 km* |  |  |  |  |  |
|  | *D* | 0.96 | 0.39 | 0.44 | 2.07 |
|  | σ | 3886.15 | 660.92 | 2791.17 | 5410.69 |
|  | G0 | 0.01 | 0.01 | 0.01 | 0.03 |
| *20 km* |  |  |  |  |  |
|  | *D* | 0.95 | 0.40 | 0.43 | 2.08 |
|  | σ | 3850.98 | 643.31 | 2781.98 | 5330.76 |
|  | G0 | 0.01 | 0.01 | 0.01 | 0.03 |
| *30 km* |  |  |  |  |  |
|  | *D* | 0.95 | 0.40 | 0.43 | 2.08 |
|  | σ | 3850.29 | 643.07 | 2781.66 | 5329.45 |
|  | G0 | 0.01 | 0.01 | 0.01 | 0.03 |

| **Parameters** | **Description** |
| --- | --- |
| *D* | Estimated density of leopard per 100 km2 |
| G0 | Capture probability at home-range centre |
| σ | Function of movement |

**Table S2.** Posterior summaries from Bayesian spatially explicit capture-recapture models used to estimate leopard density during 2014 in Srepok Wildlife Sanctuary, Cambodia.

| **Buffer width** | **Parameters** | **Posterior mean** | **Posterior SD** | **95% Lower HPD Level** | **95% Upper HPD Level** |
| --- | --- | --- | --- | --- | --- |
| *15 km* | *D* | 0.99 | 0.35 | 0.42 | 1.64 |
|  | σ | 4320.00 | 849.00 | 2870.00 | 6030.00 |
|  | λ0 | 0.03 | 0.01 | 0.01 | 0.05 |
|  | ψ | 0.25 | 0.09 | 0.09 | 0.43 |
|  | *N* | 21.10 | 7.40 | 9.00 | 35.00 |
| *30 km* | *D* | 1.01 | 0.38 | 0.37 | 1.77 |
|  | σ | 4280.00 | 842.00 | 2930.00 | 5940.00 |
|  | λ0 | 0.03 | 0.01 | 0.01 | 0.05 |
|  | ψ | 0.29 | 0.11 | 0.11 | 0.53 |
|  | *N* | 54.40 | 20.30 | 20.00 | 95.00 |

| **Parameters** | **Description** |
| --- | --- |
| *D* | Estimated density of leopard per 100 km2 |
| σ | Scale parameter |
| λ0 | Baseline encounter rate |
| ψ | Probability that an animal in the augmented data set is a real animal in the space state |
| *N* | Number of individuals in the state-space |
